# Supplementary material for: Two-dimensional copper(i) thiophenolates: a well-constructed conductive Cu–S network for excellent electromagnetic wave absorption
Source: Royal Society of Chemistry journal article supplement (doi:10.1039/c9tc01912j), 2019-01-01
Supplement: c9tc01912j1.pdf [file c9tc01912j1.pdf]

## Supporting Information

### Two-Dimensional Copper(I) Thiophenolates: A Well-Constructed Conductive Cu-S Network for Excellent Electromagnetic Waves Absorption

Lipeng Wu,<sup>1,2</sup> Yingzhi Jiao,<sup>2</sup> Kun Zhang,<sup>2,3</sup> Fan Wu,<sup>\*,1</sup> Wei Zhao,<sup>2</sup> Mengxiao Sun,<sup>1</sup> Aming Xie,<sup>\*,1</sup> Wei Dong<sup>2</sup>

<sup>1</sup> School of Mechanical Engineering, Nanjing University of Science & Technology, Nanjing 210094, China

<sup>2</sup> School of Chemical Engineering, Nanjing University of Science & Technology, Nanjing 210094, China

<sup>3</sup> Department of Chemistry, Northwestern University, Evanston, Illinois 60208, United States

\* Corresponding Authors: wufan@njust.edu.cn (F. Wu) and xieaming@njust.edu.cn (A. Xie)

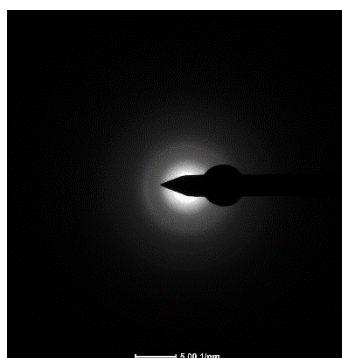

**Figure S1** The selected area electron diffraction of MCT.

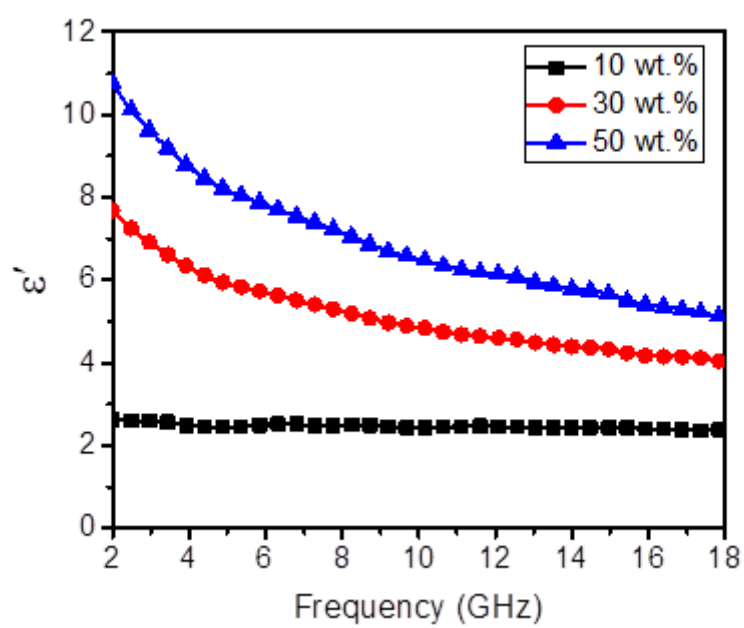

**Figure S2**  $\epsilon'$  curves and HCT.

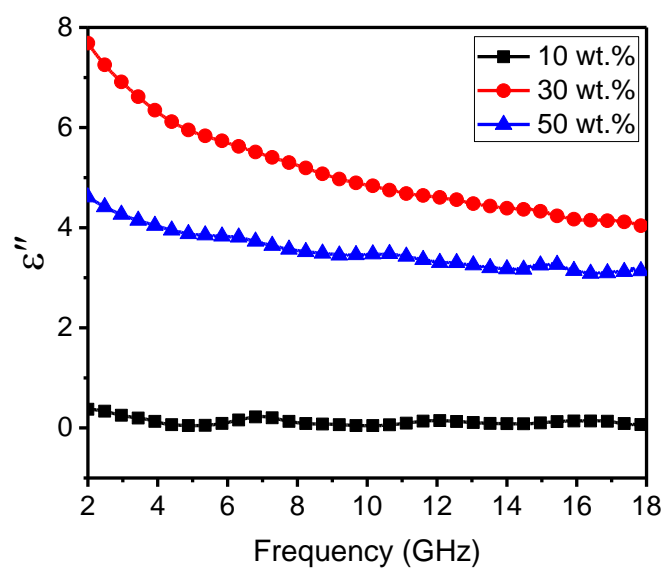

**Figure S3**  $\epsilon''$  curves of HCT.

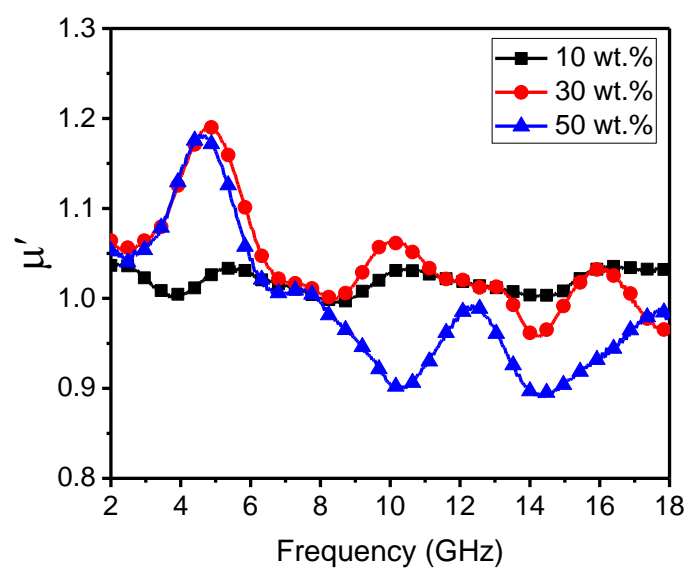

**Figure S4**  $\mu'$  curves of HCT.

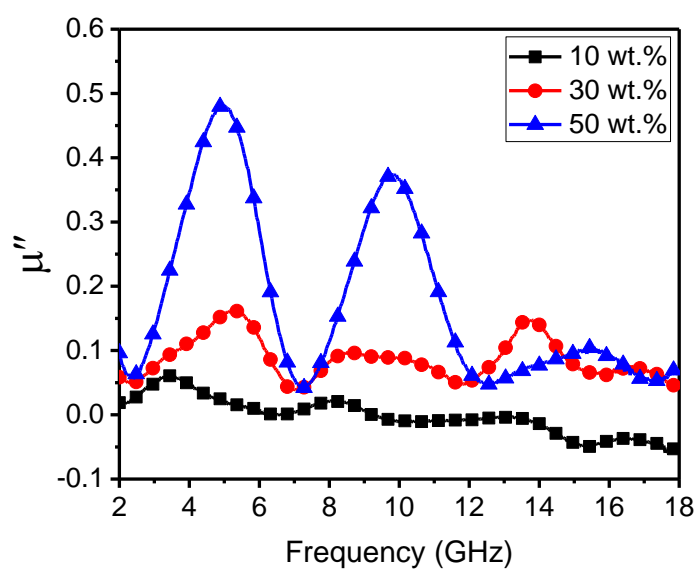

**Figure S5**  $\mu''$  curves of HCT.
